# Supplementary material
Source: Springer Nature journal article supplement (https://www.springermedizin.de/resource/supplementary/12967_2013_1826_MOESM1_ESM.pdf/9574924)
Supplement: MOESM1 [file 9574924]

**Supplemental Table 1.** AUC to the combinations of discovered antigens for pre-diagnostic (non-palpable) and tumor bearing (palpable) serum samples (n=21) as compared to FVB parental controls (n=20)

| Antigens             | IgG          |          | IgM          |          | IgG+IgM      |          |
|----------------------|--------------|----------|--------------|----------|--------------|----------|
|                      | non-palpable | palpable | non-palpable | palpable | non-palpable | palpable |
| Phdx                 | 0.507        | 0.507    | 0.5          | 0.5      | 0.507        | 0.507    |
| Otud6b               | 0.784        | 0.784    | 0.782        | 0.574    | 0.818        | 0.658    |
| Stk39                | 0.64         | 0.64     | 0.582        | 0.547    | 0.704        | 0.591    |
| Lgals8               | 0.781        | 0.813    | 0.732        | 0.574    | 0.737        | 0.593    |
| Vps35                | 0.5          | 0.5      | 0.503        | 0.5      | 0.508        | 0.5      |
| Znf238               | 0.522        | 0.548    | 0.661        | 0.541    | 0.648        | 0.534    |
| Phdx+Otud6b          | 0.751        | 0.751    | 0.681        | 0.512    | 0.751        | 0.62     |
| Pdtx+Stk39           | 0.644        | 0.644    | 0.512        | 0.52     | 0.691        | 0.63     |
| Pdtx+Lgals8          | 0.747        | 0.809    | 0.714        | 0.54     | 0.712        | 0.562    |
| Pdtx+Vps35           | 0.487        | 0.487    | 0.5          | 0.5      | 0.497        | 0.487    |
| Pdtx+Znf238          | 0.512        | 0.597    | 0.64         | 0.52     | 0.64         | 0.522    |
| Otud6b+Stk39         | 0.85         | 0.85     | 0.798        | 0.621    | 0.871        | 0.738    |
| Otud6b+Lgals8        | 0.853        | 0.87     | 0.773        | 0.647    | 0.791        | 0.711    |
| Otud6b+Vps35         | 0.744        | 0.744    | 0.712        | 0.487    | 0.784        | 0.548    |
| Otud6b+Znf238        | 0.714        | 0.732    | 0.784        | 0.528    | 0.798        | 0.61     |
| Stk39+Lgals8         | 0.774        | 0.804    | 0.749        | 0.615    | 0.788        | 0.689    |
| Stk39+Vps35          | 0.62         | 0.62     | 0.524        | 0.492    | 0.64         | 0.549    |
| Stk39+Znf238         | 0.614        | 0.634    | 0.673        | 0.584    | 0.712        | 0.64     |
| Lgals8+Vps35         | 0.712        | 0.74     | 0.716        | 0.52     | 0.687        | 0.512    |
| Lgals8+Znf238        | 0.74         | 0.734    | 0.687        | 0.54     | 0.696        | 0.52     |
| Vps35+Znf238         | 0.476        | 0.454    | 0.62         | 0.512    | 0.618        | 0.496    |
| Phdx+Otud6b+Stk39    | 0.814        | 0.814    | 0.774        | 0.614    | 0.87         | 0.712    |
| Pdtx+Otud6b+Lgals8   | 0.812        | 0.844    | 0.712        | 0.644    | 0.712        | 0.687    |
| Phdx+Otud6b+Vps35    | 0.74         | 0.712    | 0.674        | 0.49     | 0.744        | 0.52     |
| Pdtx+Otud6b+Znf238   | 0.71         | 0.712    | 0.76         | 0.518    | 0.787        | 0.598    |
| Pdtx+Stk39+Lgals8    | 0.74         | 0.812    | 0.724        | 0.62     | 0.78         | 0.664    |
| Pdtx+Stk39+Vps35     | 0.614        | 0.614    | 0.52         | 0.486    | 0.622        | 0.564    |
| Pdtx+Stk39+Znf238    | 0.64         | 0.624    | 0.664        | 0.558    | 0.72         | 0.664    |
| Pdtx+Lgals8+Vps35    | 0.667        | 0.71     | 0.683        | 0.516    | 0.664        | 0.557    |
| Pdtx+Lgals8+Znf238   | 0.72         | 0.72     | 0.614        | 0.514    | 0.698        | 0.534    |
| Pdtx+Vps35+Znf238    | 0.498        | 0.476    | 0.614        | 0.558    | 0.653        | 0.518    |
| Otud6b+Stk39+Lgals8  | 0.868        | 0.871    | 0.841        | 0.676    | 0.924        | 0.676    |
| Otud6b+Stk39+Vps35   | 0.815        | 0.776    | 0.744        | 0.624    | 0.776        | 0.714    |
| Otud6b+Stk39+Znf238  | 0.814        | 0.786    | 0.814        | 0.614    | 0.844        | 0.712    |
| Otud6b+Lgals8+Vps35  | 0.824        | 0.84     | 0.714        | 0.626    | 0.786        | 0.696    |
| Otud6b+Lgals8+Znf238 | 0.814        | 0.865    | 0.754        | 0.612    | 0.818        | 0.676    |
| Otud6b+Vps35+Znf238  | 0.74         | 0.726    | 0.716        | 0.498    | 0.653        | 0.616    |
| Stk39+Lgals8+Vps35   | 0.732        | 0.767    | 0.714        | 0.598    | 0.746        | 0.614    |
| Stk39+Lgals8+Znf238  | 0.726        | 0.764    | 0.754        | 0.578    | 0.784        | 0.692    |
| Stk39+Vps35+Znf238   | 0.578        | 0.564    | 0.534        | 0.512    | 0.683        | 0.534    |
| Lgals8+Vps35+Znf238  | 0.746        | 0.734    | 0.664        | 0.512    | 0.678        | 0.523    |

**A.**

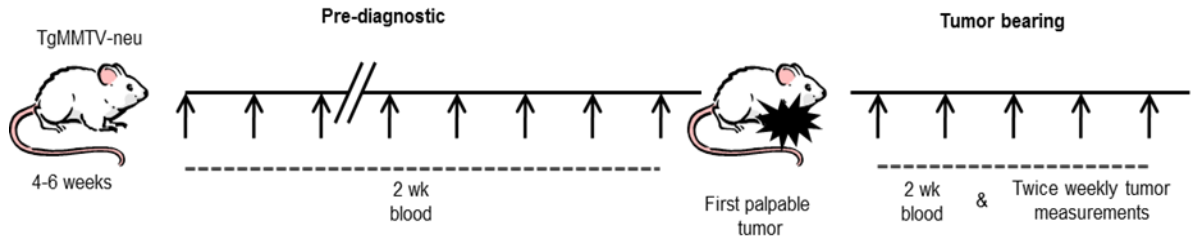

**B.**

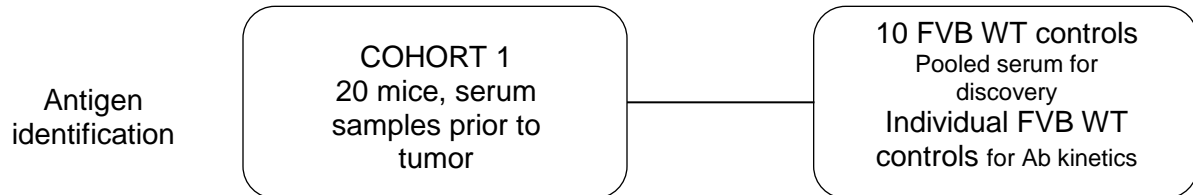

**C.**

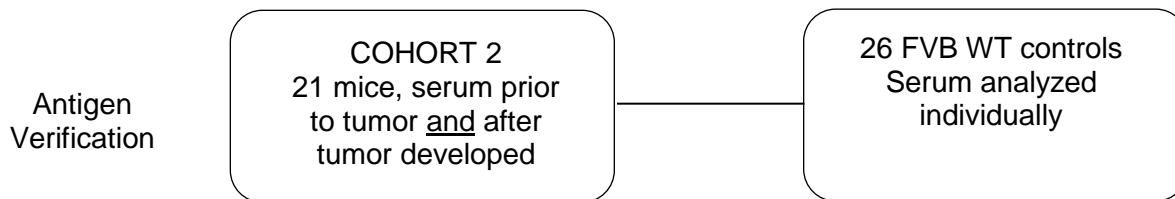

**Supplemental Figure 1**
